# Supplementary material
Source: PubMed Central journal article supplement (PMC3302305)
Supplement: supp_86.6.3200_TableS3.pdf [file supp_86.6.3200_TableS3.pdf]

**Table S3. RT2Profiler PCR array analysis showing changes in the expression of 63 genes in the brains of DOG4-RV infected mice that were either mock-treated or treated with TriGAS vaccine versus expression of genes in brains of normal control mice.**

The genes analyzed in this array were selected from clusters of differentially expressed mRNA coding genes identified by the whole transcriptome analysis shown in Table S1. The data represent normalized average values obtained from 3 mice per group. Red numbers indicate significant up-regulation ( $p < 0.01$ ) and blue numbers indicate significant down-regulation in gene expression ( $p < 0.01$ ) of infected versus uninfected mice. Underlined red numbers indicate higher gene expression in brains of TriGAS versus mock-treated mice.

|           |           | d4          |             | d6          |             | d8           |              |             |
|-----------|-----------|-------------|-------------|-------------|-------------|--------------|--------------|-------------|
|           |           | Mock        | TriGAS      | Mock        | TriGAS      | Mock         | TriGAS       |             |
| Cluster 1 | Cdc25b    | <u>1.9</u>  | 1.2         | <u>2.5</u>  | 1.2         | -1.2         | -1.3         |             |
|           | Hdac5     | 1.4         | -1.2        | 1.3         | 1.1         | <u>-16.8</u> | <u>-2.1</u>  |             |
|           | Runx2     | <u>4.3</u>  | 1.8         | <u>5.8</u>  | <u>2.5</u>  | <u>3.1</u>   | 1.3          |             |
|           | Ttf1      | 1.8         | 1.2         | <u>1.9</u>  | 1.2         | 1.3          | -1.1         |             |
| Cluster 2 | Btla      | <u>2.1</u>  | 1.1         | <u>3.1</u>  | -1.2        | <u>2.5</u>   | 1.0          |             |
|           | Cd72      | 1.6         | -1.1        | <u>1.9</u>  | 1.4         | <u>6.3</u>   | <u>13.3</u>  |             |
|           | Dhx58     | 1.1         | 1.1         | <u>2.2</u>  | 1.3         | <u>16.7</u>  | <u>11.4</u>  |             |
|           | H2-Q7     | -1.0        | 1.7         | 1.4         | 1.7         | <u>12.5</u>  | <u>13.3</u>  |             |
|           | Ifih1     | 1.4         | 1.3         | <u>4.9</u>  | <u>2.3</u>  | <u>93.8</u>  | <u>16.3</u>  |             |
|           | Lcn2      | 1.7         | -1.4        | <u>2.5</u>  | <u>4.2</u>  | <u>154.8</u> | <u>7.7</u>   |             |
|           | Ly6i      | <u>2.0</u>  | -1.0        | <u>3.1</u>  | <u>1.8</u>  | <u>3.1</u>   | <u>13.3</u>  |             |
|           | Mefv      | -1.6        | -1.2        | 1.6         | 1.1         | -1.1         | <u>4.6</u>   |             |
|           | Mmp3      | 1.4         | -1.2        | <u>5.0</u>  | 1.7         | <u>17.3</u>  | <u>20.6</u>  |             |
|           | Nlrp1a    | 1.1         | -1.2        | <u>2.1</u>  | -1.5        | 1.7          | <u>1.9</u>   |             |
|           | Nlrp1b    | <u>1.9</u>  | -1.5        | <u>3.4</u>  | 1.2         | 1.2          | 1.4          |             |
|           | Oas1a     | -1.4        | -1.6        | <u>2.2</u>  | 1.7         | <u>40.3</u>  | <u>10.3</u>  |             |
|           | Ppil5     | <u>-2.2</u> | <u>-2.8</u> | -1.3        | -2.0        | <u>-2.8</u>  | -1.5         |             |
|           | Siglec1   | 1.7         | 1.2         | <u>5.3</u>  | 1.5         | <u>32.4</u>  | <u>10.7</u>  |             |
|           | Cluster 3 | Batf2       | -1.6        | -1.2        | <u>3.5</u>  | <u>3.3</u>   | <u>23.6</u>  | <u>16.8</u> |
| Cd2       |           | -1.1        | -1.2        | 1.2         | 1.3         | -1.2         | <u>9.8</u>   |             |
| Cd44      |           | -1.1        | -1.2        | 1.1         | -1.1        | <u>3.2</u>   | 1.4          |             |
| Cfb       |           | <u>2.0</u>  | 1.1         | <u>2.2</u>  | <u>1.8</u>  | <u>7.5</u>   | <u>6.7</u>   |             |
| Cybb      |           | <u>1.9</u>  | 1.3         | <u>2.4</u>  | <u>3.0</u>  | <u>9.9</u>   | <u>11.0</u>  |             |
| Gbp10     |           | 1.5         | 1.7         | <u>4.7</u>  | <u>3.3</u>  | <u>100.3</u> | <u>21.9</u>  |             |
| Irf7      |           | 1.3         | <u>2.5</u>  | <u>6.4</u>  | <u>4.1</u>  | <u>133.0</u> | <u>42.8</u>  |             |
| Mx1       |           | 1.1         | 1.0         | <u>14.1</u> | <u>6.3</u>  | <u>357.9</u> | <u>31.0</u>  |             |
| Mx2       |           | 1.1         | -1.3        | <u>5.6</u>  | <u>3.4</u>  | <u>59.8</u>  | <u>8.9</u>   |             |
| Nlrc5     |           | <u>-6.7</u> | <u>-3.5</u> | -1.0        | <u>-2.7</u> | <u>2.0</u>   | -1.6         |             |
| Parp14    |           | -1.0        | -1.2        | <u>3.2</u>  | <u>2.3</u>  | <u>26.6</u>  | <u>4.6</u>   |             |
| Plac8     |           | 1.5         | 1.3         | <u>12.8</u> | <u>14.2</u> | <u>206.0</u> | <u>139.7</u> |             |
| Sifn4     |           | <u>2.1</u>  | -1.1        | <u>10.7</u> | <u>12.2</u> | <u>192.9</u> | <u>159.8</u> |             |
| Tap1      |           | 1.3         | 1.1         | <u>3.5</u>  | <u>2.6</u>  | <u>38.4</u>  | <u>11.5</u>  |             |
| Usp18     |           | 1.9         | <u>2.1</u>  | <u>8.5</u>  | <u>5.9</u>  | <u>231.6</u> | <u>56.2</u>  |             |
| Zpb1      |           | <u>-3.0</u> | -2.0        | <u>2.1</u>  | 1.3         | <u>24.5</u>  | <u>9.1</u>   |             |
| Cluster 4 |           | Cd69        | <u>-5.5</u> | <u>-4.2</u> | <u>2.0</u>  | 1.7          | <u>14.0</u>  | <u>12.1</u> |
|           |           | Cmpk2       | 1.4         | 1.2         | 1.8         | 1.4          | <u>12.5</u>  | <u>5.3</u>  |
|           |           | Il12b       | -1.2        | -1.3        | -1.4        | <u>5.4</u>   | <u>155.5</u> | <u>29.2</u> |
|           |           | Il1rn       | <u>-2.0</u> | -1.4        | 1.1         | -1.1         | <u>5.6</u>   | <u>9.5</u>  |
|           | Irg1      | 1.4         | -1.2        | <u>2.5</u>  | <u>4.4</u>  | <u>17.9</u>  | <u>30.7</u>  |             |
|           | Lck       | -1.0        | -1.2        | 1.4         | 1.3         | 3.2          | 3.1          |             |
|           | Lilrb4    | <u>1.9</u>  | 1.3         | <u>2.7</u>  | <u>2.3</u>  | <u>15.6</u>  | <u>17.4</u>  |             |
|           | Pabpc3    | <u>-2.4</u> | <u>-3.4</u> | -1.6        | <u>-5.2</u> | <u>-4.1</u>  | <u>-2.4</u>  |             |
|           | Plaur     | 1.1         | -1.0        | 1.5         | 1.4         | <u>15.4</u>  | <u>8.8</u>   |             |
|           | Ptpnc     | <u>2.0</u>  | 1.5         | <u>1.9</u>  | <u>2.6</u>  | <u>2.3</u>   | <u>6.9</u>   |             |
|           | Cluster 5 | Apaf1       | <u>2.2</u>  | 1.3         | <u>1.9</u>  | 1.1          | 1.5          | -1.1        |
| Arntl2    |           | <u>2.6</u>  | 1.2         | <u>3.6</u>  | 1.0         | 1.5          | -1.7         |             |
| Ccl3      |           | <u>-3.0</u> | -1.6        | -1.2        | <u>4.2</u>  | <u>9.8</u>   | <u>18.5</u>  |             |
| Cd40      |           | 1.1         | -1.3        | 1.3         | 1.5         | <u>3.3</u>   | <u>8.1</u>   |             |
| Ceacam1   |           | 1.8         | 1.2         | <u>2.6</u>  | 1.3         | 1.3          | <u>-2.1</u>  |             |
| Col3a1    |           | -1.4        | -1.4        | -1.0        | -1.2        | <u>-2.9</u>  | <u>-2.7</u>  |             |
| GzmA      |           | -1.4        | <u>2.3</u>  | 1.7         | <u>6.0</u>  | <u>6.1</u>   | <u>20.3</u>  |             |
| Lin9      |           | <u>3.7</u>  | 1.0         | <u>3.8</u>  | <u>1.8</u>  | <u>2.2</u>   | -1.1         |             |
| Mapk13    |           | -1.5        | -1.6        | -1.4        | -1.1        | <u>-2.3</u>  | <u>-2.1</u>  |             |
| Postn     |           | <u>2.0</u>  | 1.1         | <u>1.8</u>  | 1.2         | 1.8          | -1.3         |             |
| Prkdc     |           | <u>1.9</u>  | -1.0        | <u>2.1</u>  | -1.1        | -1.1         | <u>-2.6</u>  |             |
| Rgs1      |           | <u>-2.4</u> | <u>-2.2</u> | -1.1        | -1.8        | <u>2.9</u>   | <u>5.5</u>   |             |
| Sele      |           | -1.5        | -1.1        | <u>2.8</u>  | <u>5.4</u>  | <u>29.0</u>  | <u>18.0</u>  |             |
| Cluster 6 |           | Adcy7       | <u>2.0</u>  | -1.1        | <u>2.2</u>  | 1.3          | 1.1          | -1.8        |
|           | Ccl17     | -1.6        | -1.3        | -1.0        | -1.5        | 1.7          | <u>-3.3</u>  |             |
|           | Cdh3      | 1.5         | -1.1        | 1.2         | -1.4        | 1.4          | <u>2.3</u>   |             |
|           | Celsr1    | -1.2        | -1.6        | 1.1         | -1.3        | <u>-3.0</u>  | <u>-3.0</u>  |             |
|           | Kcnq1     | 1.1         | -1.5        | 1.1         | -1.4        | <u>-2.4</u>  | <u>-2.2</u>  |             |
| Cluster 7 | Glimn     | 1.6         | 1.2         | 1.7         | -1.1        | 1.0          | <u>-2.1</u>  |             |
